# Supplementary material for: Fabrication of highly conductive graphene/textile hybrid electrodes via hot pressing and their application as piezoresistive pressure sensors
Source: Royal Society of Chemistry journal article supplement (doi:10.1039/d2tc00165a), 2022-01-01
Supplement: d2tc00165a1.pdf [file d2tc00165a1.pdf]

## Supporting Information

### **Fabrication of Highly Conductive Graphene/Textile Hybrid Electrode via Hot Pressing and its Application as a Piezoresistive Pressure Sensor**

Youn Kim,<sup>a</sup> Jung Bin Park,<sup>b</sup> Yeon Ju Kwon,<sup>a</sup> Jin-Yong Hong,<sup>a</sup> Young-Pyo Jeon,<sup>a</sup> and Jea Uk

*Lee* <sup>\*b</sup>

<sup>a</sup> *Carbon Industry Frontier Research Center, Korea Research Institute of Chemical Technology (KRICT), 141 Gajeong-ro, Yuseong-gu, Daejeon 34114, Republic of Korea*

<sup>b</sup> *Department of Advanced Materials Engineering for Information and Electronics, Integrated Education Institute for Frontier Science & Technology (BK21 Four), Kyung Hee University, 1732 Deogyeong-daero, Giheung-gu, Yongin-si, Gyeonggi-do, 17104, Republic of Korea*

\* Corresponding author: Jea Uk Lee; E-mail: [leeju@khu.ac.kr](mailto:leeju@khu.ac.kr)

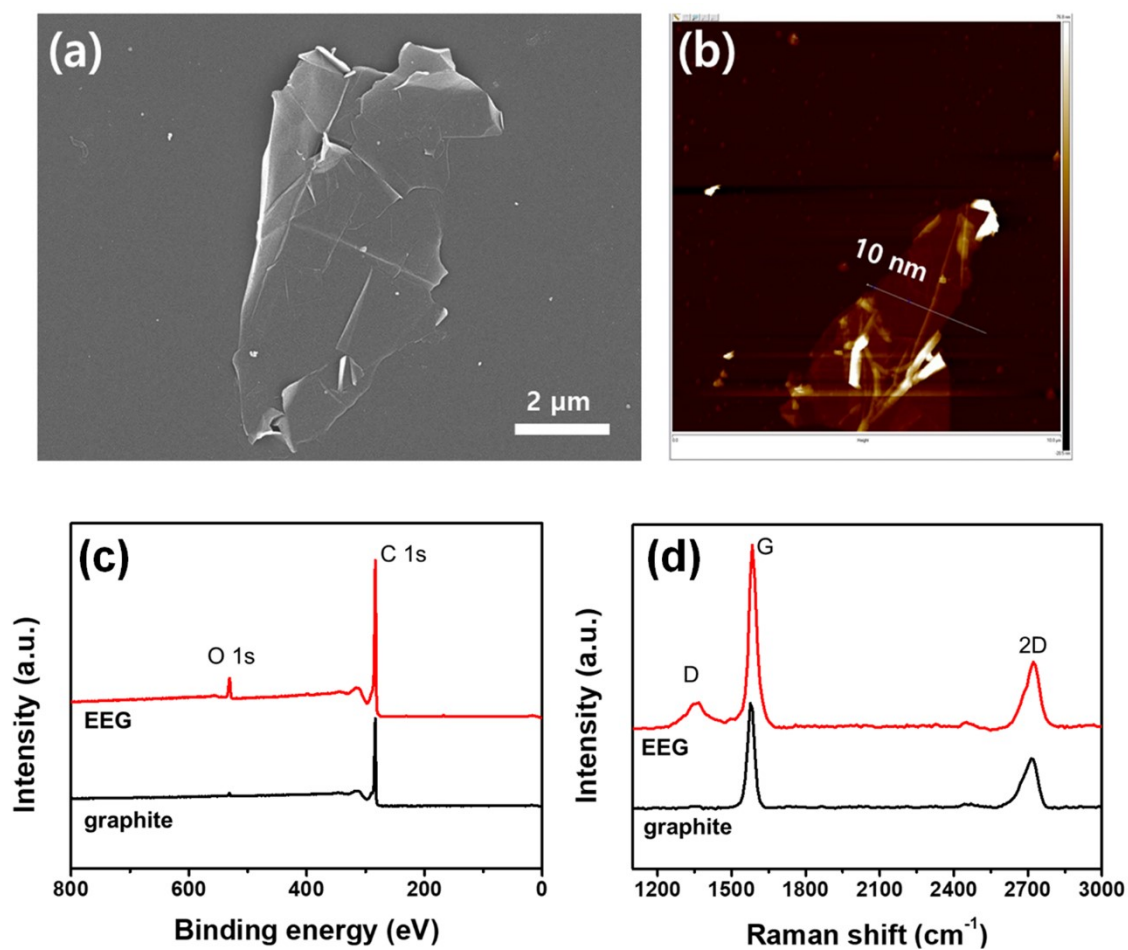

**Figure S1.** (a) SEM and AFM images of EEG on silicon substrate. (c) XPS and (d) Raman spectra of EEG and graphite.

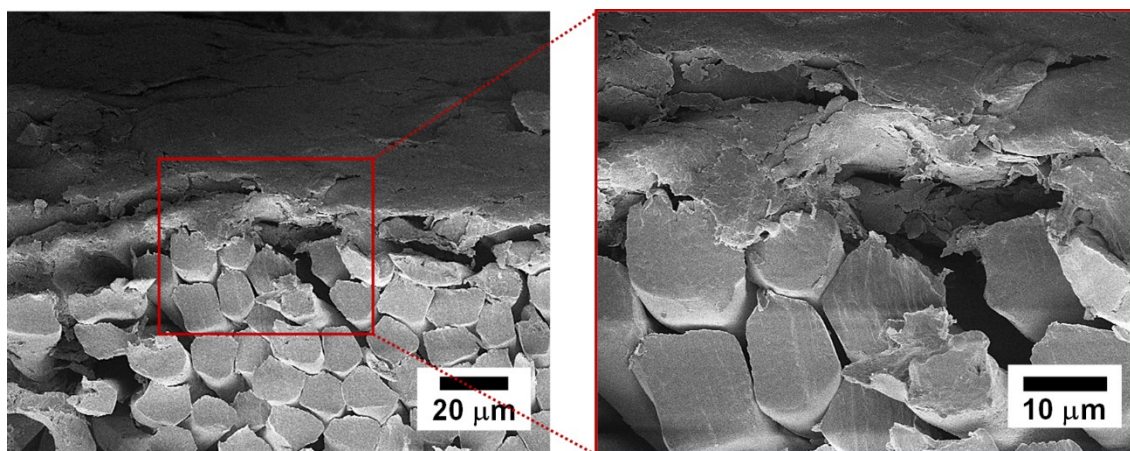

**Figure S2.** Magnified SEM images of interface between EEG film and the textile surface.

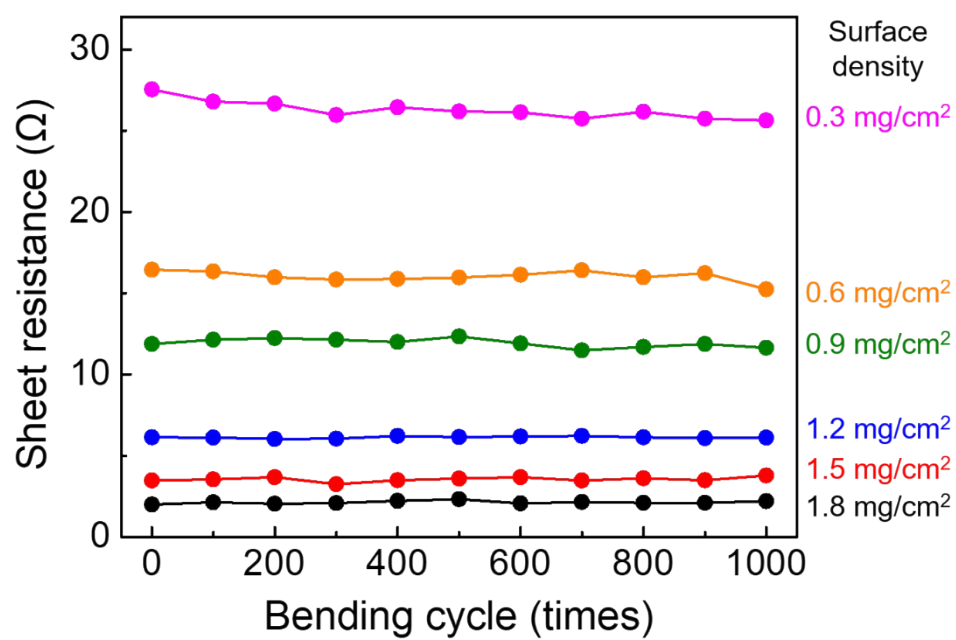

**Figure S3.** Changes in the sheet resistance of EEG/textile electrodes with different surface densities of the EEG film on the textile ( $0.3\text{--}1.8\text{ mg cm}^{-2}$ ), depending on the bending cycles (under a bending radius of  $0.75\text{ cm}$ ).

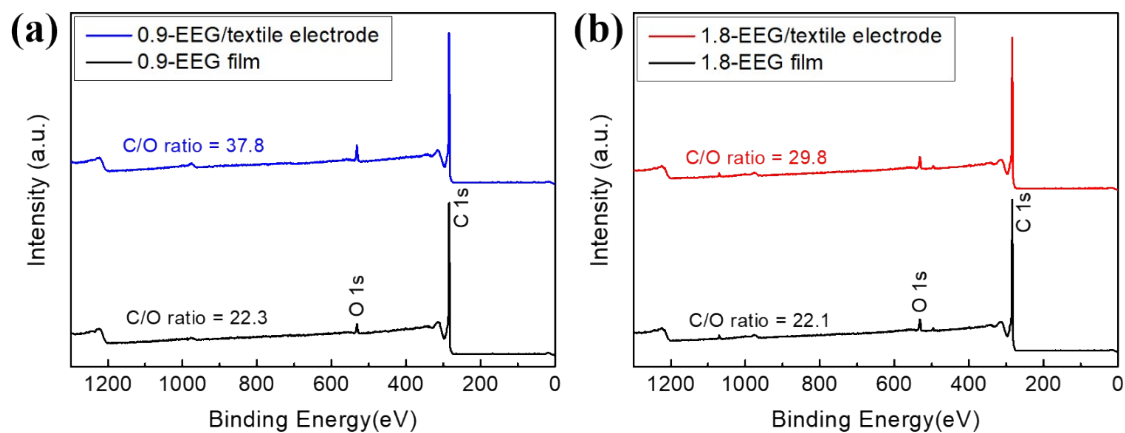

| Sample                    | C (%) | O (%) | C/O ratio |
|---------------------------|-------|-------|-----------|
| 0.9-EEG film              | 94.85 | 4.25  | 22.3      |
| 0.9-EEG/textile electrode | 96.77 | 2.56  | 37.8      |
| 1.8-EEG film              | 94.32 | 4.27  | 22.1      |
| 1.8-EEG/textile electrode | 95.32 | 3.20  | 29.8      |

**Figure S4.** Wide-scan XPS spectra of (a) 0.9-EEG film and 0.9-EEG/textile electrode, (b) 1.8-EEG film and 1.8-EEG/textile electrode. The table shows C and O atomic percentage and C/O ratio of each sample.

To identify the effect of the hot pressing technique on the surface roughness of the textile substrate, we performed SEM and Alpha-Step analyses of the cotton textile after removing the EEG films. Since the EEG films with surface densities higher than  $1.8 \text{ mg cm}^{-2}$  became separated from the cotton textile when bending the EEG/textile electrode several times, we could analyze the surface state of the textile substrate after hot pressing with the EEG films. As shown in SEM image, some graphene clusters remain (blue circles in SEM image), but the shape of the cotton textile does not change significantly after removing the EEG films. Furthermore, RMS roughness ( $R_q$ ) decreases slightly from  $11.0 \text{ }\mu\text{m}$  for the bare textile to  $10.18 \text{ }\mu\text{m}$  for the textile after removing the EEG films, which may be attributed to the deformation of textile form by hot pressing and remaining graphene clusters. Therefore, it is confirmed that the hot pressing technique does not significantly change the surface roughness and morphology of the textile substrate.

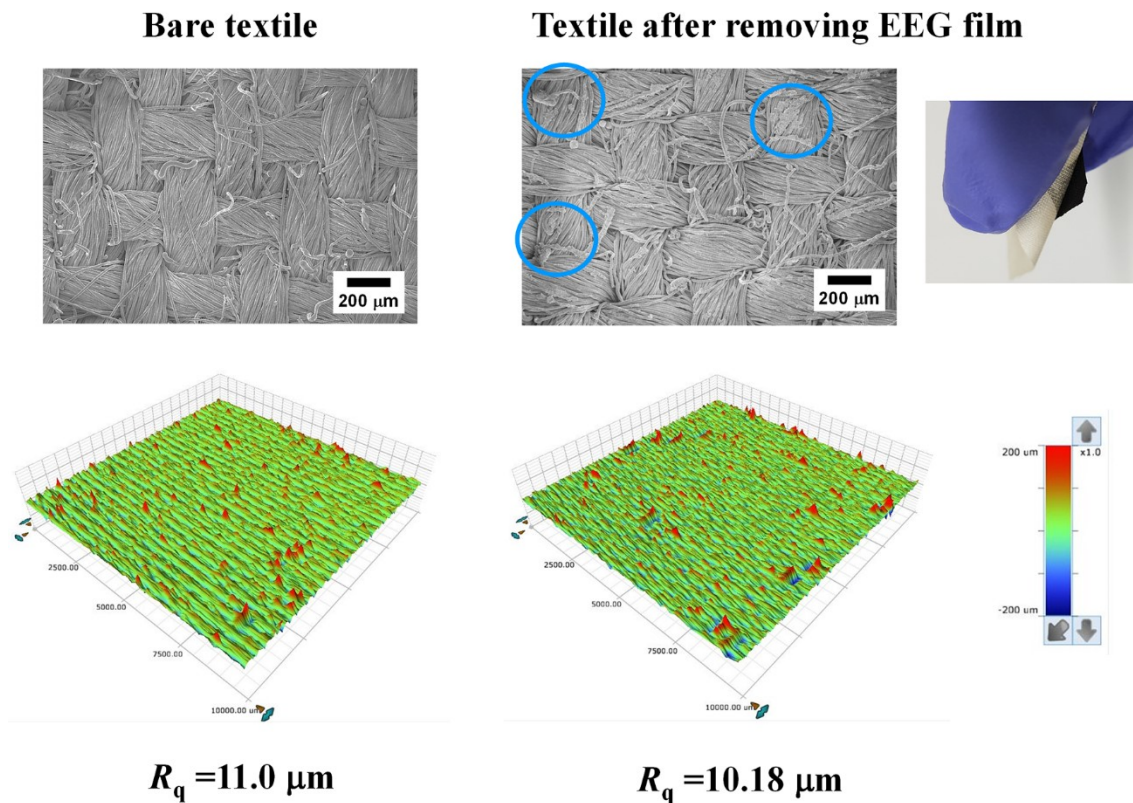

**Figure S5.** SEM and Surface-3D profile images of the bare textile and textile substrate after removing the EEG film. The RMS roughness is shown at the bottom.

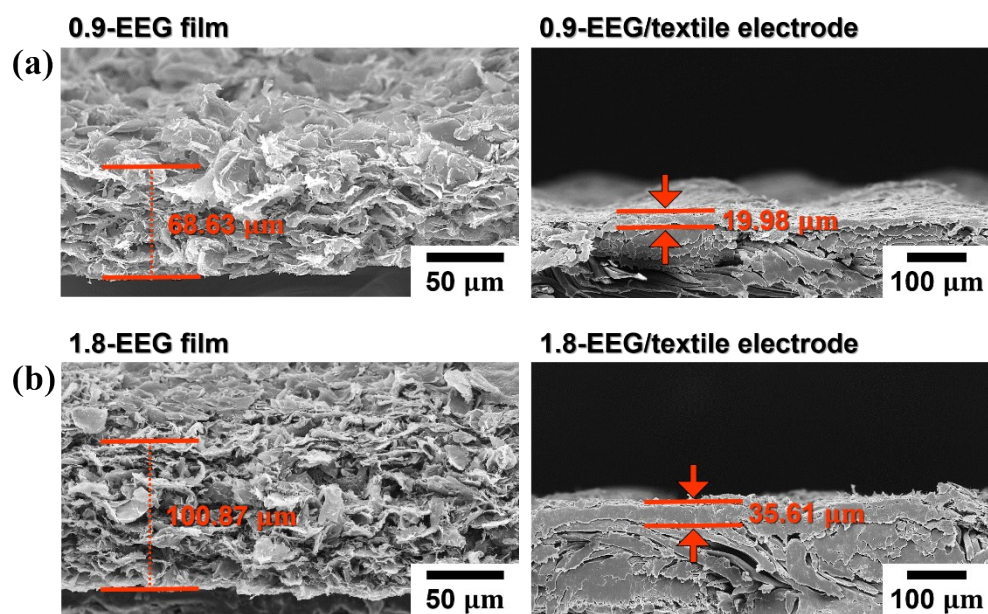

**Figure S6.** SEM images of (a) 0.9-EEG film and 0.9-EEG/textile electrode and of (b) 1.8-EEG film and 1.8-EEG/textile electrode.

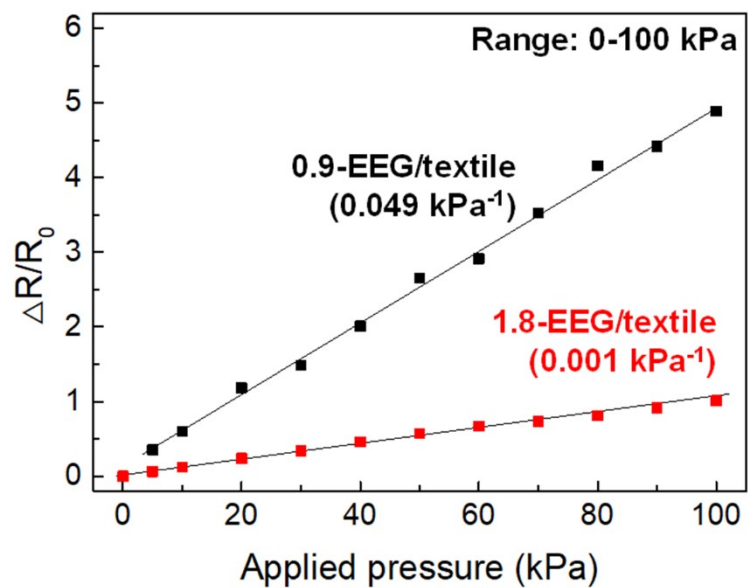

**Figure S7.** Change in  $\Delta R/R_0$  of the pressure sensors as a function of the applied pressure of 0-100 kPa.



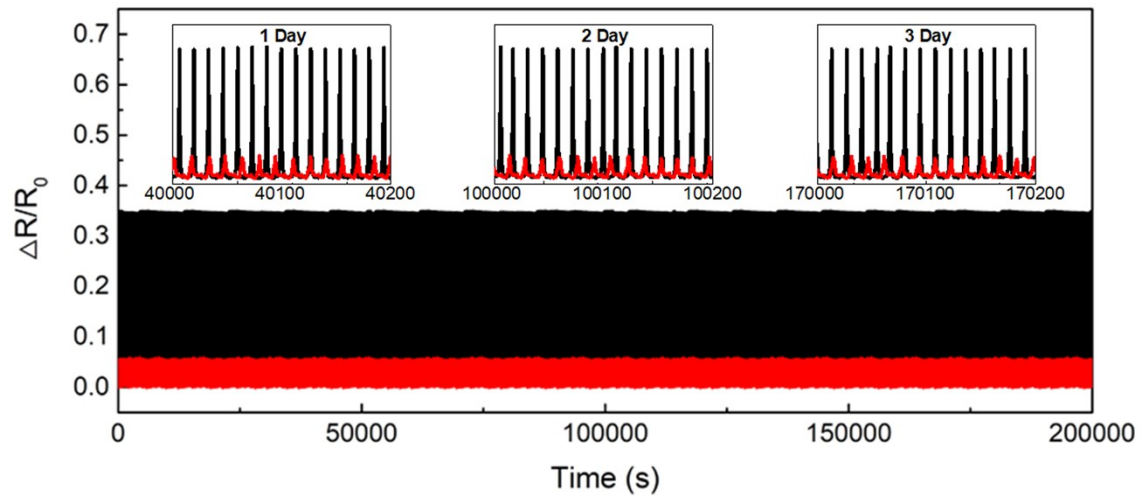

**Figure S8.** Change in  $\Delta R/R_0$  of the sensors over 10,000 loading and unloading cycles with a maximum pressure of 5.0 kPa. The top insets show magnified graphs measured on the first, second, and third days.

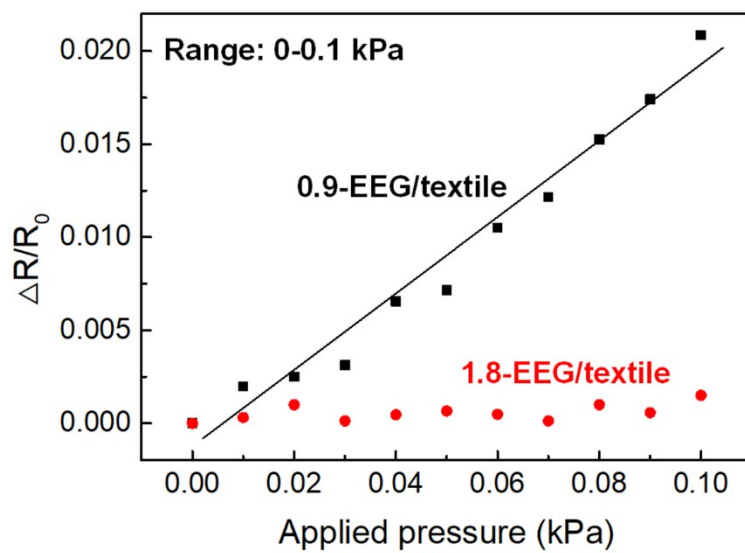

**Figure S9.** Change in  $\Delta R/R_0$  of the pressure sensors as a function of the applied pressure of 0-100 Pa.

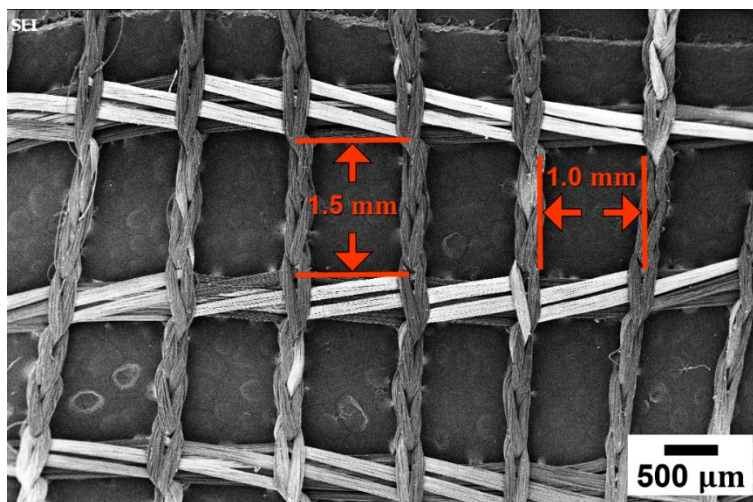

**Figure S10.** SEM image of the polyester fabric with a mesh pattern and opening width of 1.5 mm and length of 1.0 mm.
